# Supplementary material
Source: MDPI journal article supplement (https://www.mdpi.com/1099-4300/18/10/376)
Supplement: s1 [file s1]

## Supplementary Materials: Isothermal Oxidation of Aluminized Coatings on High-Entropy Alloys

Che-Wei Tsai, Kuen-Cheng Sung, Kzauki Kasai and Hideyuki Murakami

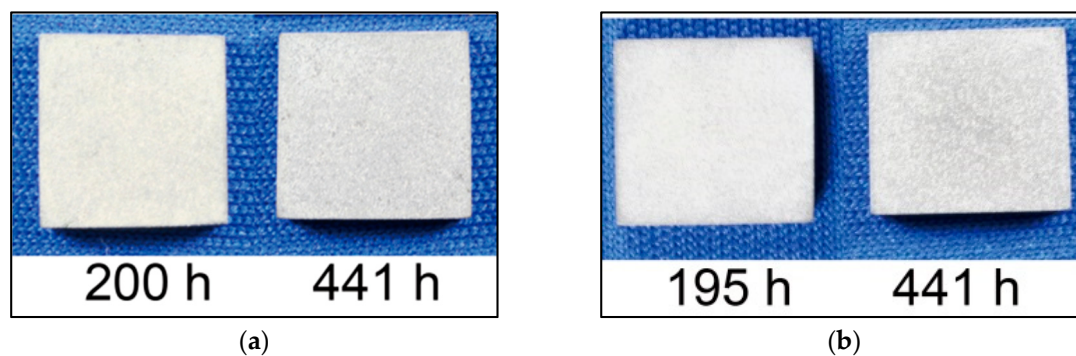

**Figure S1.** The isothermal oxidation resistance of the  $\text{Al}_{0.2}\text{Co}_{1.5}\text{CrFeNi}_{1.5}\text{Ti}_{0.3}$  alloy after aluminizing: the surface morphology samples at (a) 1173 K for 200 h and 441 h; and (b) 1273 K for 195 h and 441 h.
